# Supplementary material
Source: Royal Society of Chemistry journal article supplement (doi:10.1039/d6fo00434b)
Supplement: d6fo00434b1.pdf [file d6fo00434b1.pdf]

## Supplementary File

**Table S1.** The primer sequences used for RT-qPCR

| Genes         | Primers | Sequences (5'-3')         |
|---------------|---------|---------------------------|
| LOX           | F       | GACACGTTGCACAGGGAGAG      |
|               | R       | GTTCGGCCCAGATTAAGTCG      |
| Cptp          | F       | GTGCCCTTTAGTCCTGTACCC     |
|               | R       | CTAATCCAGTGAGGTCCGGG      |
| Lpcat3        | F       | CTACAGGCAGGCTAGAACCAG     |
|               | R       | GAACCTACAGTGTCCCCCTTG     |
| Fabp4         | F       | GCCCACTCCTACAGGGAGAA      |
|               | R       | TGTAGTTAGCAGACAGGCACAG    |
| $\beta$ actin | F       | CATCCGTAAAGACCTCTATGCCAAC |
|               | R       | ATGGAGCCACCGATCCACA       |
| Irs1          | F       | CCGGATACCGATGGCTTCTC      |
|               | R       | CCGCCACTTCTTCTCGTTCT      |
| Cd36          | F       | ATGGGCTGTGATCGGAACTG      |
|               | R       | GTCTTCCCAATAAGCATGTCTCC   |

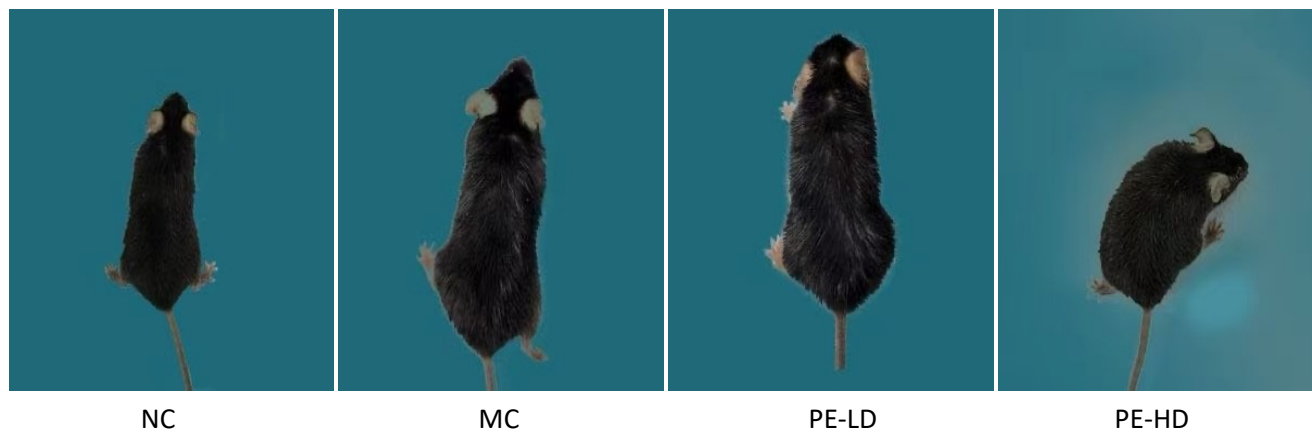

Figure S1. Physical appearance of mice before the sample collection.

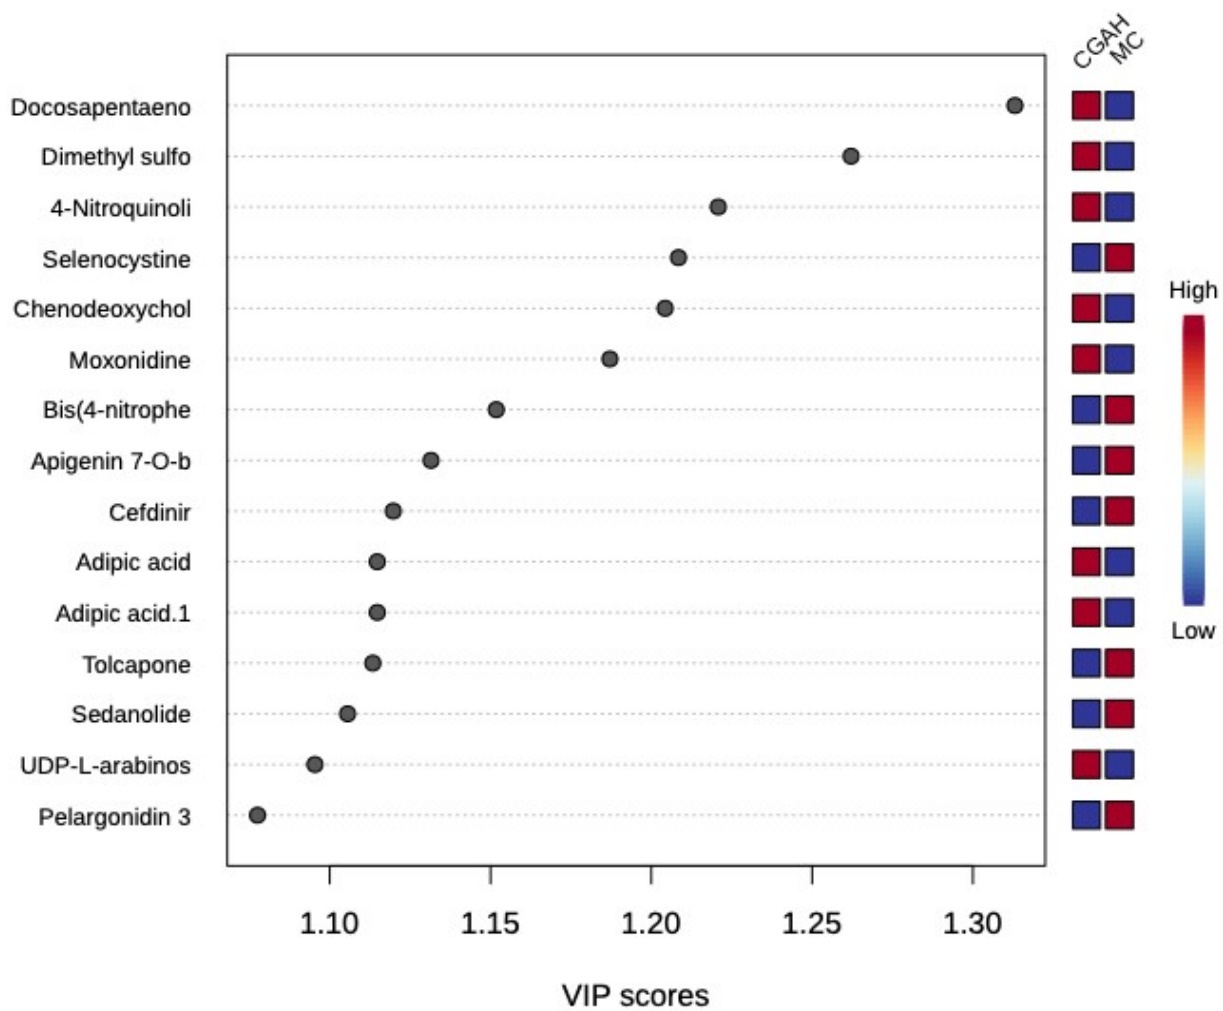

Figure S2. VIP value of key biomarkers of non-targeted metabolites in gut.

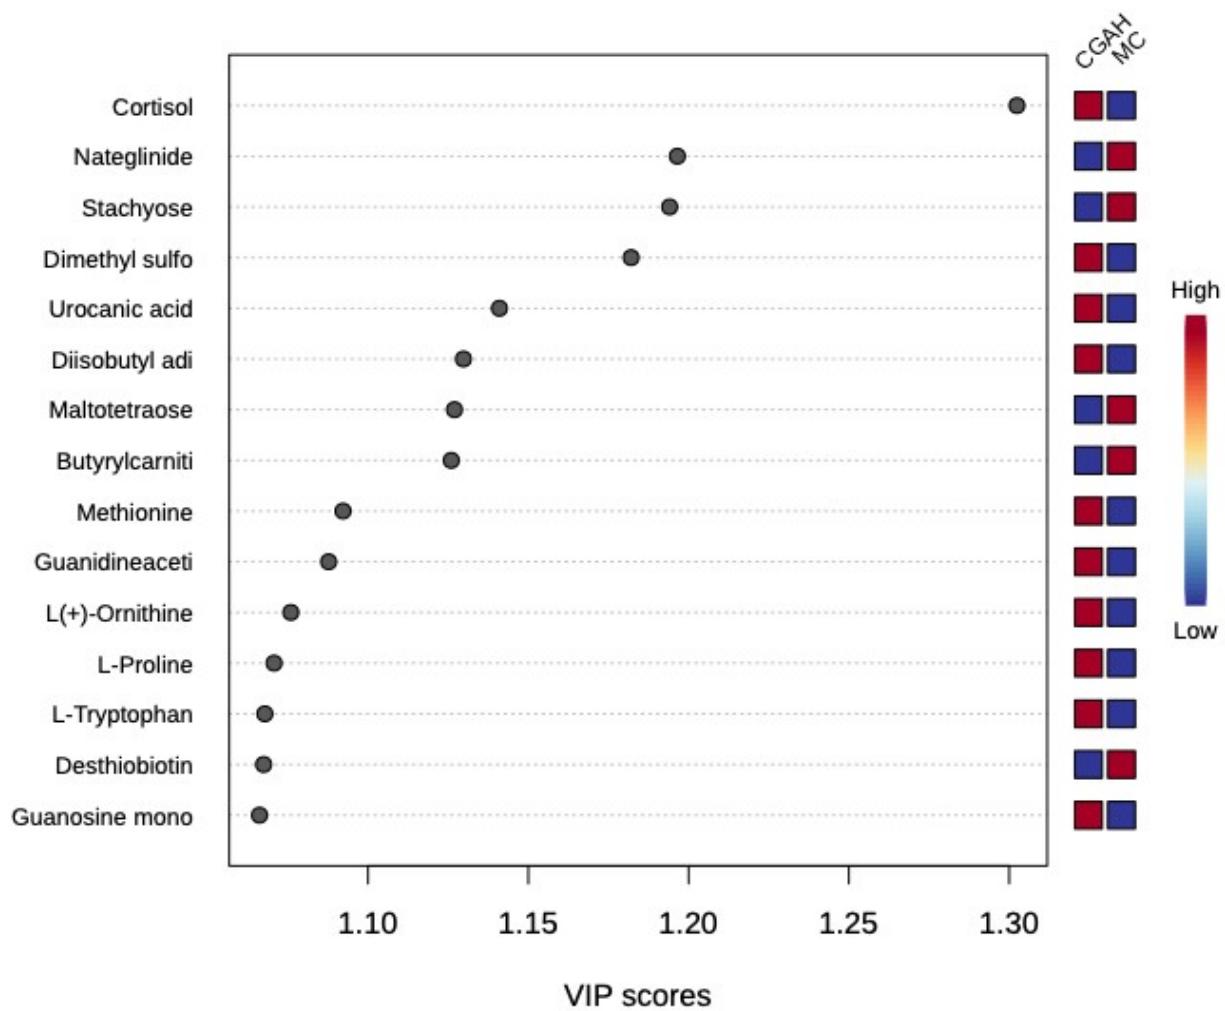

Figure S3. VIP value of key biomarkers of non-targeted metabolites in liver.
